# Supplementary material for: Molecular analysis and epidemiological typing of Vancomycin-resistant Enterococcus outbreak strains
Source: PubMed Central journal article supplement (PMC6695431; doi:10.1038/s41598-019-48436-2), 2019-08-15
Supplement: 41598_2019_48436_MOESM1_ESM.pdf [file 41598_2019_48436_MOESM1_ESM.pdf]

## **Supplementary information**

### **Molecular analysis and epidemiological typing of Vancomycin-resistant *Enterococcus* outbreak strains**

Anbjørg Rangberg, Astri Lervik Larsen, Oliver Kacelnik, Hanne Skarpodde Sæther, Marthe Bjørland, Jetmund Ringstad, Christine Monceyron Jonassen

**Table 1. Primers used for SNP-profiling of *E.faecium*.**

| Primer name | Sequence                      |
|-------------|-------------------------------|
| purK115 C F | AGAAAAATCTTTTTTGGAAACGAAC     |
| purK115 T F | AGAAAAATCTTTTTTGGAAACGAAT     |
| purK115 R   | GATCCCGTCAATCGCATCTT          |
| purK 115 F  | AGAAAAATCTTTTTTGGAAACGAA      |
| atpA314 C F | CCGTAAAACAGGGAAAACCTTC        |
| atpA314 T F | CCGTAAAACAGGGAAAACCTTCT       |
| atpA314 R   | GATCATATCTTGACCTTTTTGGTTGA    |
| atpA314 F   | CCGTAAAACAGGGAAAACCTTC        |
| pstS452CR   | GTGTACATATGTTTCATATGACCAGATTC |
| pstS452TR   | GTGTACATATGTTTCATAKGACCAGATTT |
| pstS452F    | TCGACGGTGTAGAACCAAAGA         |
| pstS452R    | GTGTACATATGTTTCATATGACCAGATT  |
| atpA485CR   | CAGCATATGGTGCGATATAAAGC       |
| atpA485TR   | CAGCATATGGTGCGATATAAAGT       |
| atpA485F    | ACATTGAAAAAATATGGCGCAAT       |
| atpA485R    | CAGCATATGGTGCGATATAAAG        |
| gyd160GR    | CCGTCTAATTTACCGTTCAATTCC      |
| gyd160TR    | CCGTCTAATTTACCGTTCAATTCT      |
| gyd160AR    | CCGTCTAATTTACCRITCAATTCA      |
| gyd160F     | GCAAACATCGTWCCTAACTCAACW      |
| gyd160R     | CCGTCTAATTTACCRITCAATTCC      |
| pstS87CF    | GTGGATCATAAAGTAGCAGTGGTC      |
| pstS87TF    | GTGGATCATAAAGTAGCAGTRGTT      |
| pstS87R     | GTAAGATATCAATCAATTCCTGTTTKG   |
| pstS87F     | GTGGATCATAAAGTAGCAGTGGT       |
| atpA188GR   | GTAAACAGATTTACGTTGCATAACG     |
| atpA188AR   | GTAAACAGATTTACGTTGCATAACA     |
| atpA188F    | AATYGACGGACTAGGTGAAATCG       |
| atpA188R    | GTAAACAGATTTACGTTGCATAAC      |
| purK217AR   | CCCTTGCCATCATAGCCA            |
| purK217GR   | CCYTTGCCATCATARCCG            |
| purK217F    | GATCGTCAGTCCGACRGATATC        |
| purK217R    | CCCTTGCCATCATAGCC             |
